# Supplementary material for: Identification of autophosphorylation sites in eukaryotic elongation factor-2 kinase
Source: PubMed Central journal article supplement — Biochem J. 2012 Feb 24;442(Pt 3):681–92. doi: 10.1042/BJ20111530 (PMC3286862; doi:10.1042/bj20111530), 2012-02-24
Supplement: bj4420681add.pdf [file bj4420681add.pdf]

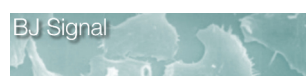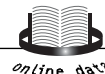

SUPPLEMENTARY ONLINE DATA

Identification of autophosphorylation sites in eukaryotic elongation factor-2 kinase

Sébastien PYR DIT RUYS<sup>\*1</sup>, Xuemin WANG<sup>†‡1</sup>, Ewan M. SMITH<sup>†2</sup>, Gaëtan HERINCKX<sup>\*</sup>, Nusrat HUSSAIN<sup>\*</sup>, Mark H. RIDER<sup>\*</sup>, Didier VERTOMMEN<sup>\*</sup> and Christopher G. PROUD<sup>†‡3</sup>

<sup>\*</sup>Université catholique de Louvain and de Duve Institute, 75 Avenue Hippocrate, B-1200 Brussels, Belgium, <sup>†</sup>Department of Biochemistry and Molecular Biology, University of British Columbia, Vancouver, BC, Canada, V6T 1Z3, and <sup>‡</sup>Centre for Biological Sciences, Life Sciences Building, University of Southampton, Southampton SO17 1BJ, U.K.

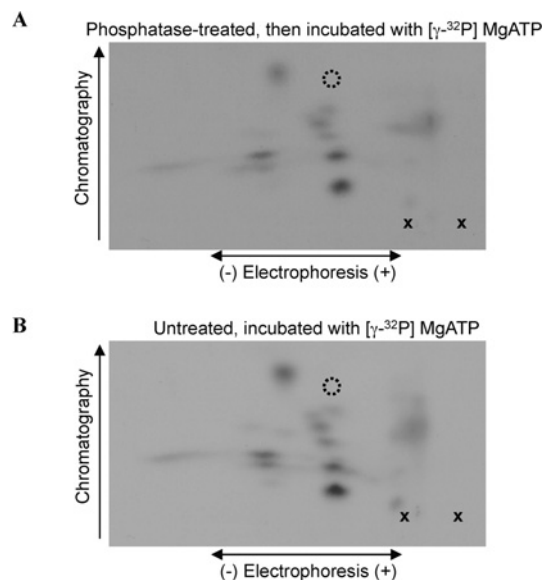

**Figure S1 2D autophosphorylation peptide maps of alkaline-phosphatase-treated compared with untreated wild-type eEF2K**

(A) Wild-type eEF2K was first dephosphorylated with alkaline phosphatase and subsequently allowed to undergo autophosphorylation in the presence of  $Ca^{2+}$  /CaM as described in the Experimental section of the main text. (B) Wild-type eEF2K phosphorylated in the presence of  $Ca^{2+}$  /CaM without pre-treatment. After tryptic digestion, phosphopeptides were resolved by 2D electrophoresis and chromatography (polarity and directions are indicated). The positions where the sample (larger 'X') and the DNP-lysine (smaller 'x') were applied, and the final migration position of the DNP-lysine marker (broken open circle) are also shown.

Received 15 September 2011/21 December 2011; accepted 4 January 2012  
Published as BJ Immediate Publication 4 January 2012, doi:10.1042/BJ20111530

<sup>1</sup> These authors contributed equally to this work.

<sup>2</sup> Present address: MRC Toxicology Unit, Hodgkin Building, Lancaster Road, Leicester, LE1 9HN, U.K.

<sup>3</sup> To whom correspondence should be addressed (email c.g.proud@soton.ac.uk).
